# Supplementary material for: Sensitization of drug resistant sarcoma tumors by membrane modulationviashort chain sphingolipid-containing nanoparticles
Source: Royal Society of Chemistry journal article supplement (doi:10.1039/d0nr02257h), 2020-01-01
Supplement: d0nr02257h1.pdf [file d0nr02257h1.pdf]

## Supplementary Figures

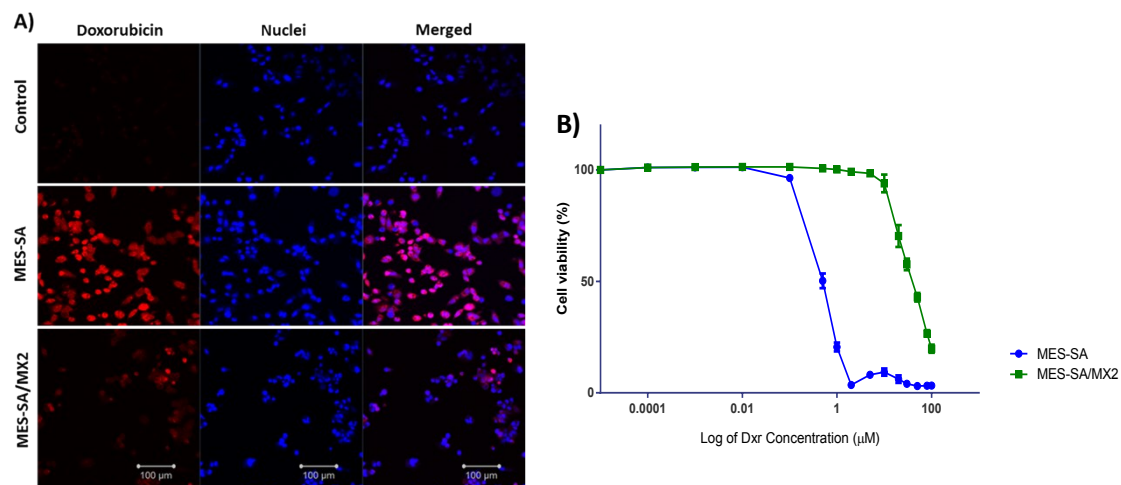

Figure S1. Sensitivity evaluation to Dxr of MES-SA and MES-SA/MX2 cell lines. A) Confocal images (20X) of  $6 \times 10^4$  cells treated with  $30 \mu\text{g/ml}$  of free Dxr, after 4 h of exposure. B) Cytotoxicity evaluation of both cell lines ( $2 \times 10^4$ ) exposed 4 h to 0-100  $\mu\text{M}$  of free Dxr. Survival cells were determined by SRB assay at 72 h in triplicate along 3 independent studies. Survival percentage of each cell line was calculated as the relative percentage of their correspondent control (untreated cells), which was set at 100%. The concentration at which the half of cells are killed, Inhibitory Concentration 50 ( $IC_{50}$ ), was determined by plotting survival versus the log of the concentration and fitting a non-linear regression curve using GraphPad Prism software v8.01. MES-SA/ $MX2$   $IC_{50}$ :  $41.72 \mu\text{M}$ ; MES-SA  $IC_{50}$ :  $0.478 \mu\text{M}$ .

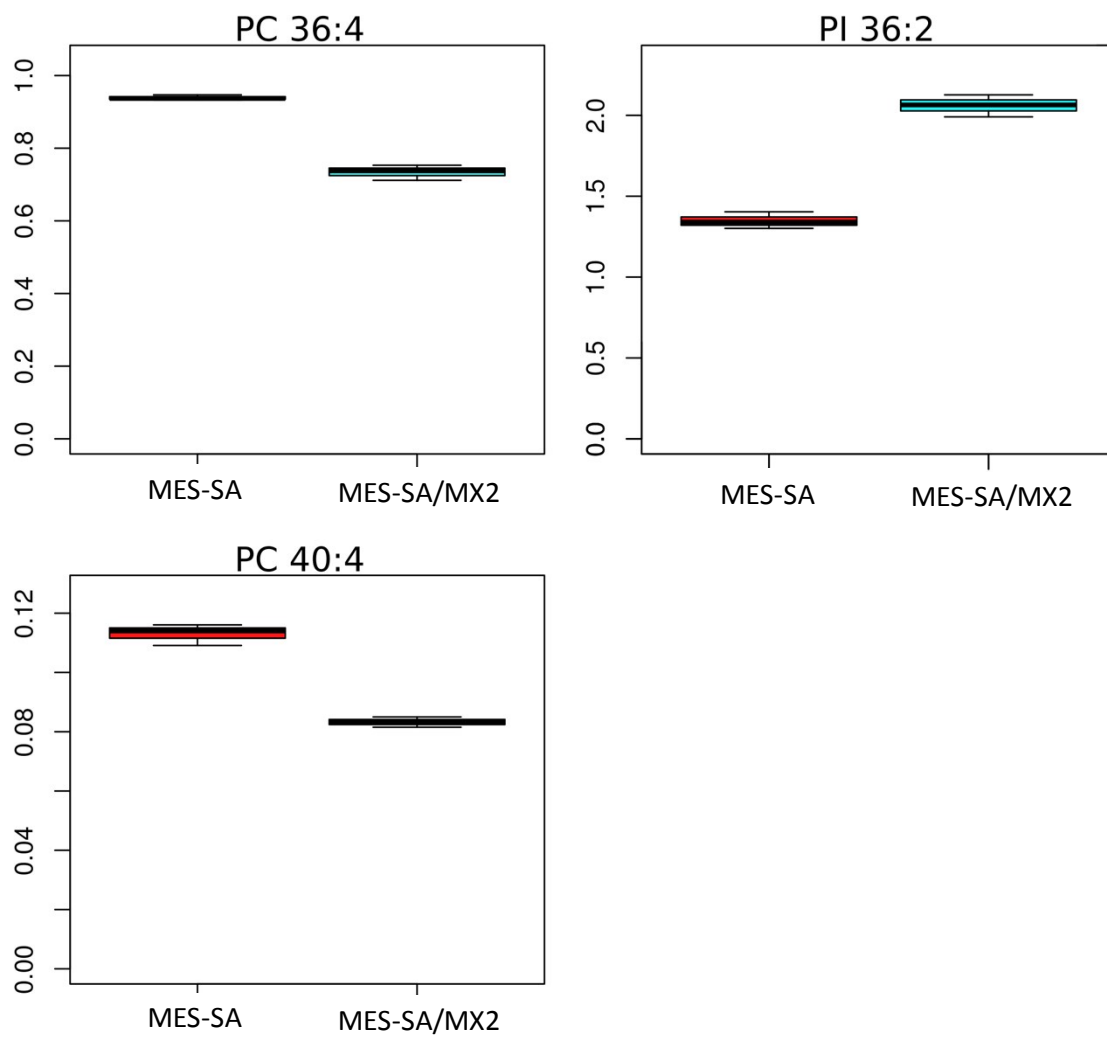

Figure S2. Detailed distribution of the unsaturation pattern in the lipid species that contributed most to cell line differences.

| A)      | MES-SA      |                            |                          |
|---------|-------------|----------------------------|--------------------------|
|         | 10% FBS     | 5% FBS                     | 0% FBS                   |
| Dxr     | 0.47 ± 0.02 | 0.27 ± 0.01 <sup>1,2</sup> | 0.50 ± 0.05 <sup>2</sup> |
| Dxr SCS | 0.47 ± 0.01 | 0.31 ± 0.01 <sup>1,2</sup> | 0.85 ± 0.13              |

  

|  | MES-SA/MX2                        |                                 |                            |
|--|-----------------------------------|---------------------------------|----------------------------|
|  | 10% FBS                           | 5% FBS                          | 0% FBS                     |
|  | 41.60 ± 0.02 <sup>1,2,3,4,5</sup> | 10.60 ± 0.64 <sup>1,2,4,5</sup> | 5.27 ± 0.57 <sup>2,5</sup> |
|  | 30.24 ± 4.24 <sup>2,4</sup>       | 4.29 ± 0.83                     | 0.46 ± 0.44                |

  

| B)         | Loss of resistance factor |              |              |
|------------|---------------------------|--------------|--------------|
|            | 10% FBS                   | 5% FBS       | 0% FBS       |
| MES-SA     | 1.00 ± 0.003              | 0.85 ± 0.024 | 1.55 ± 0.48  |
| MES-SA/MX2 | 1.38 ± 0.10               | 2.50 ± 0.315 | 11.35 ± 6.53 |

  

| C)        | Resistance ratio |              |             |
|-----------|------------------|--------------|-------------|
|           | 10% FBS          | 5% FBS       | 0% FBS      |
| Dxr       | 86.88 ± 3.82     | 38.88 ± 2.45 | 6.25 ± 0.81 |
| Dxr + SCS | 63.21 ± 7.42     | 13.39 ± 2.35 | 0.65 ± 0.55 |

Figure S3. Different serum percentages were used to evaluate the effect of SCS on Dxr efficacy on MES-SA and MES-SA/MX2 cell lines after 72 h of continuous exposure. A) Average and standard deviation of  $IC_{50}$  values were calculated after 3 independent experiments. B) Loss of resistance Factor calculation dividing Dxr  $IC_{50}$ /Dxr+SCS  $IC_{50}$  values of the same tested condition. C) Resistance ratio was calculated dividing MES-SA/MX2  $IC_{50}$  values by MES-SA  $IC_{50}$  values of the same tested condition. 1:  $p < 0.05$  vs Dxr 0% FBS; 2:  $p < 0.05$  vs Dxr SCS 0%FBS; 3:  $p < 0.05$  vs Dxr 5% FBS; 4:  $p < 0.05$  vs Dxr SCS 5% FBS; 5:  $p < 0.05$  vs Dxr SCS 10% FBS.

| A) | Sample     | Size $\pm$ SD (nm) | PDI $\pm$ SD    | Zeta potential $\pm$ SD (mV) | EE (%)          |
|----|------------|--------------------|-----------------|------------------------------|-----------------|
|    | LP-Dxr     | 82.56 $\pm$ 1.8    | 0.03 $\pm$ 0.02 | -8.19 $\pm$ 0.8              | 99.91 $\pm$ 1.5 |
|    | LP-SCS-Dxr | 83.83 $\pm$ 1.1    | 0.06 $\pm$ 0.01 | -8.95 $\pm$ 0.6              | 93.33 $\pm$ 3.2 |

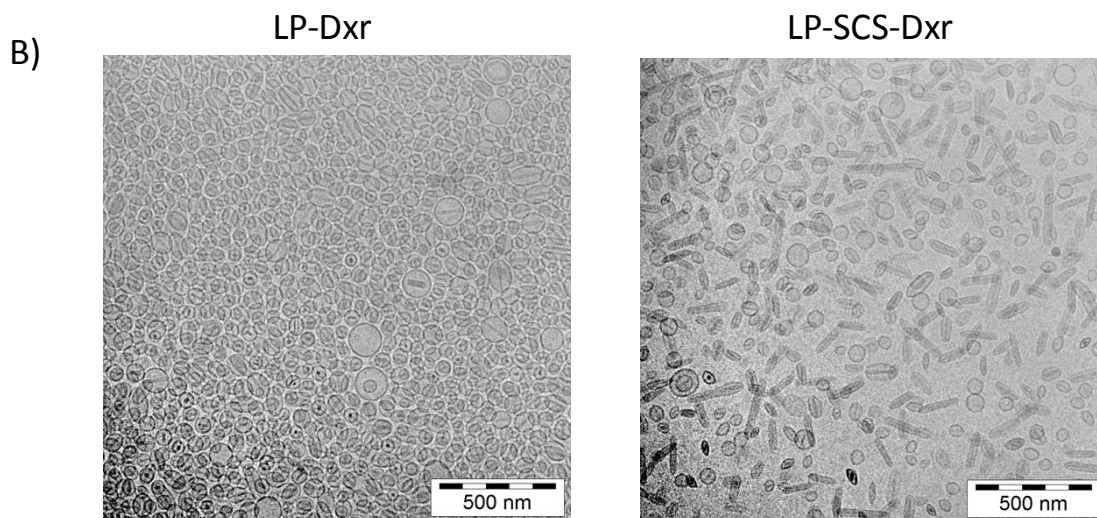

Figure S4. Physicochemical characterization of Doxil-like liposomes (LP-Dxr) and SCS liposomes (LP-SCS-Dxr). A) Liposomes were tested in terms of size, polydispersity index (PDI), surface charge or Zeta potential and encapsulation efficacy (EE). Data correspond to the average and standard deviation (SD) of 5 independent experiments measured in triplicate in water (1:100 dilutions); B) Cryo-TEM images of Dxr liposomes with or without SCS. Drug precipitate can be seen inside liposomes. LP-SCS-Dxr have more elongated rod-like structures upon loading with Dxr. The bar in the micrograph represents 500 nm. A 6,300X magnification was used.

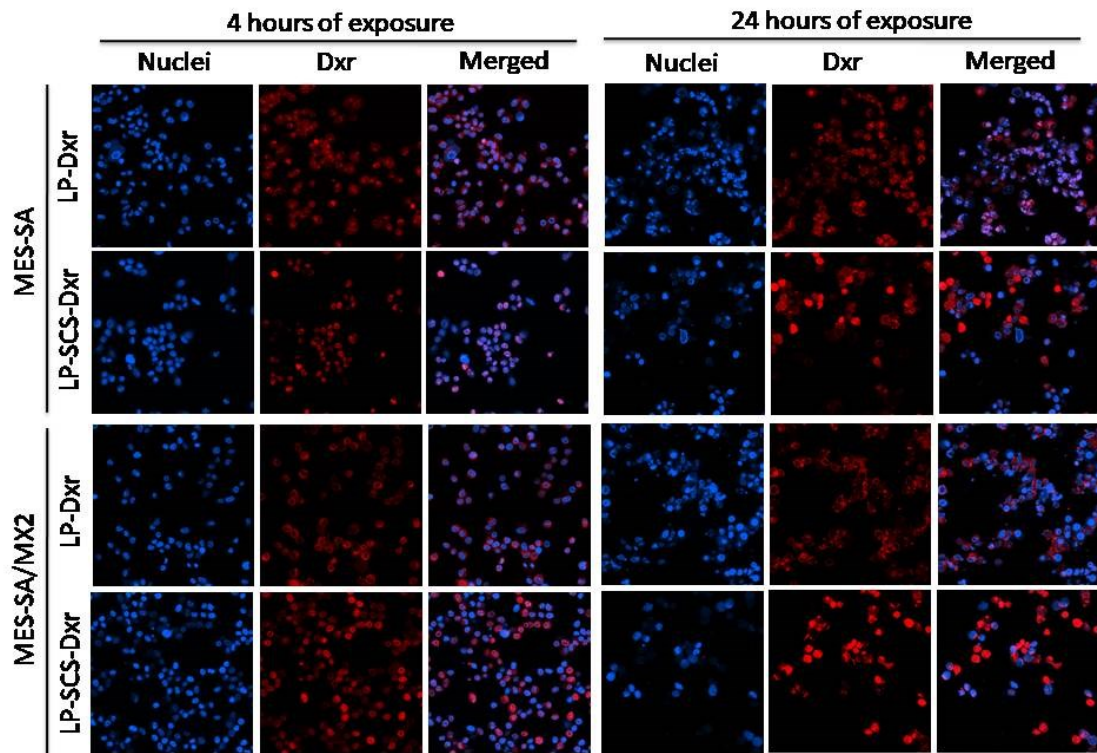

Figure S5. Confocal images of MES-SA and MES-SA/MX2 cell lines after 4 h and 24 h of exposure to LP-Dxr or LP-SCS-Dxr at 20X. Nuclei were stained in blue and Dxr signal is depicted in red in the images. The experiment was repeated 3 times with very similar results.

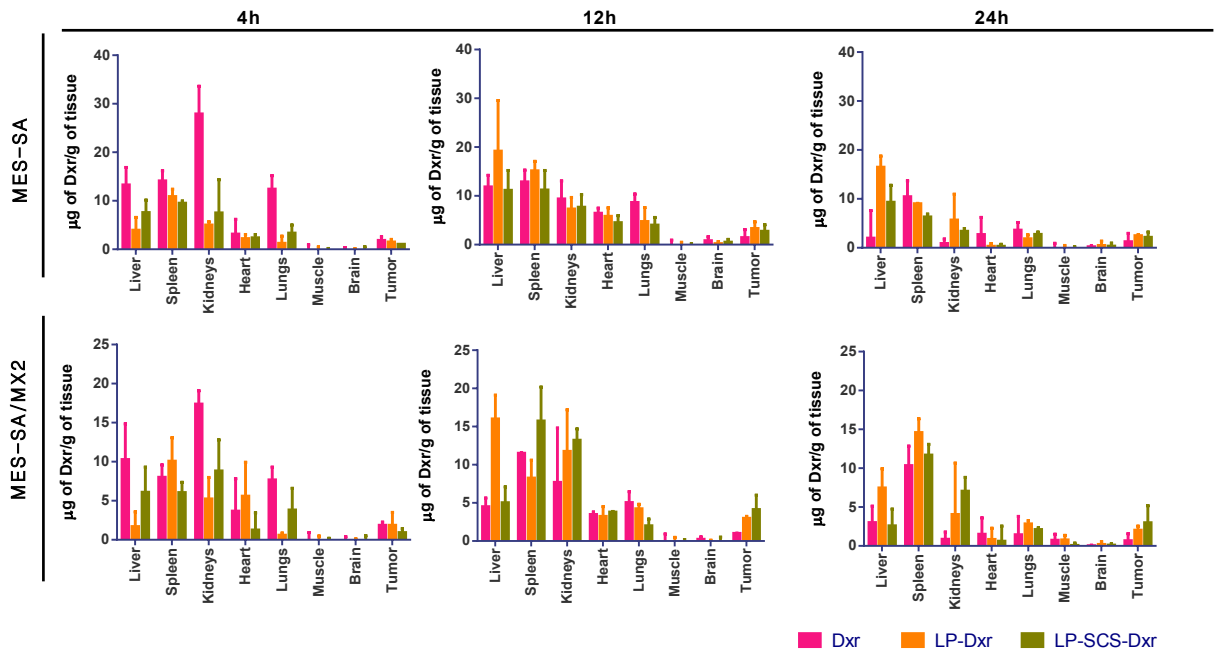

Figure S6. Dxr distribution profiles in different organs at 4, 12 and 24 h in sensitive (MES-SA) and resistant (MES-SA/MX2) tumor-bearing mice. Bars represent the average of 3 mice  $\pm$  SD.
